# Supplementary material for: Dual-Stage Artificial Neural Network (Ann) Model for Sequential Lbmm-μedm Based Micro Drilling
Source: Research Square preprint supplement (doi:10.21203/rs.3.rs-385339/v1), 2021-04-07
Supplement: Supplementary file 1 [file 805a9c5e164dee5902378b9e.xlsx]

## Sheet: Sheet1
Supplementary Dataset 2
	Experimental Data(True)
Hole No.	Entry Area(mm2)	Exit Area(mm2)	HAZ(mm2)	Recast Layer(mm2)
1	0.073	0.036	0.303	0.023
2	0.074	0.035	0.218	0.018
3	0.074	0.034	0.219	0.022
4	0.072	0.036	0.479	0.017
5	0.076	0.045	0.589	0.027
6	0.078	0.045	0.623	0.045
7	0.078	0.044	0.66	0.04
8	0.078	0.044	0.605	0.045
9	0.08	0.049	0.571	0.028
10	0.077	0.049	0.54	0.029
11	0.079	0.05	0.486	0.03
12	0.08	0.049	0.545	0.038
13	0.086	0.052	0.501	0.035
14	0.085	0.053	0.431	0.036
15	0.084	0.053	0.476	0.026
16	0.085	0.053	0.489	0.028
17	0.068	0	0.217	0.011
18	0.063	0	0.248	0.01
19	0.057	0	0.261	0.017
20	0.059	6.13e-05	0.247	0.014
21	0.065	0.000405	0.517	0.026
22	0.064	0.00165	0.442	0.028
23	0.067	0.00122	0.525	0.016
24	0.07	1.69e-05	0.477	0.016
25	0.072	0.014	0.725	0.025
26	0.061	0.017833	0.65	0.037
27	0.063	0.021	0.617	0.036
28	0.067	0.02	0.664	0.03
29	0.069	0.042	0.691	0.03
30	0.07	0.04	0.736	0.025
31	0.068	0.041	0.741	0.014
32	0.078	0.042	0.658	0.044
33	0.06	0	0.246	0.014
34	0.061	0	0.252	0.015
35	0.064	0	0.216	0.016
36	0.057	0	0.254	0.015
37	0.067	0.00101	0.374	0.019
38	0.064	0.000734	0.398	0.021
39	0.067	0.000902	0.369	0.023
40	0.066	0.000471	0.39	0.02
41	0.063	0.00349	0.557	0.024
42	0.07	0.00549002	0.538	0.028
43	0.067	0.0044626	0.531	0.026
44	0.064	0.0055469	0.521	0.022
45	0.073	0.0139098	0.664	0.048
46	0.071	0.0146628	0.676	0.036
47	0.076	0.019	0.67	0.053
48	0.074	0.0151835	0.621	0.045
49	0.067	0	0.239	0.013
50	0.064	0	0.193	0.012
51	0.062	0	0.226	0.012
52	0.065	0	0.209	0.014
53	0.068	0	0.383	0.016
54	0.068	0	0.305	0.014
55	0.064	0	0.357	0.014
56	0.061	0	0.357	0.013
57	0.069	0.00259842	0.502	0.013
58	0.07	0.00205	0.466	0.017
59	0.067	0.00379302	0.485	0.014
60	0.067	0.00103	0.435	0.018
61	0.068	0.00942211	0.629	0.023
62	0.075	0.013	0.627	0.038
63	0.07	0.0104437	0.594	0.032
64	0.067	0.010813	0.685	0.03
65	0.06	0	0.227	0.016
66	0.063	0	0.208	0.017
67	0.068	0	0.236	0.016
68	0.068	0	0.263	0.015
69	0.064	0	0.265	0.016
70	0.087	0.047	0.392	0.046
71	0.082	0.051	0.463	0.045
72	0.089	0.053	0.408	0.045
73	0.081	0.053	0.467	0.041
74	0.081	0.053	0.408	0.042
75	0.066	0.00021015	0.355	0.019
76	0.067	0.00027	0.375	0.021
77	0.068	0.00040441	0.405	0.025
78	0.063	0	0.317	0.021
79	0.062	6.221e-05	0.357	0.022
80	0.064	0.00025506	0.422	0.021
81	0.063	0	0.369	0.025
82	0.064	0	0.386	0.022
83	0.064	0	0.427	0.022
84	0.06	2.4e-05	0.343	0.019
85	0.06	0	0.326	0.02
86	0.061	8.799e-05	0.349	0.02
87	0.062	0.000471	0.401	0.019
88	0.064	0.00079012	0.426	0.022
89	0.065	0.0010562	0.469	0.023
90	0.061	0.00073279	0.434	0.019
91	0.067	0.00197965	0.448	0.029
92	0.06	0.00420683	0.523	0.019
93	0.064	0.00050653	0.391	0.023
94	0.064	0.000686951	0.398	0.024
95	0.063	0.00150773	0.504	0.021
96	0.063	0.0011513	0.487	0.025
97	0.065	0.00184682	0.462	0.018
98	0.068	0.00169144	0.514	0.026
99	0.063	0.000268868	0.366	0.018
100	0.064	0.000273766	0.356	0.022
101	0.063	0.00046654	0.394	0.021
102	0.062	0.00123794	0.437	0.022
103	0.065	0.00206935	0.499	0.021
104	0.066	0.00278	0.518	0.02
105	0.059	0.0190778	0.711	0.016
106	0.059	0.021	0.465	0.022
107	0.068	0.03	0.455	0.022
108	0.059	0.0081604	0.557	0.022
109	0.057	0.0110431	0.545	0.018
110	0.059	0.0194692	0.617	0.015
111	0.058	0.011268	0.551	0.024
112	0.065	0.0143773	0.611	0.024
113	0.064	0.0191866	0.657	0.032
114	0.064	0.000954463	0.47	0.022
115	0.063	0.00162465	0.492	0.019
116	0.062	0.00217802	0.544	0.022
117	0.063	0.00265903	0.542	0.023
118	0.064	0.00416066	0.582	0.023
119	0.066	0.00790337	0.639	0.026
